# Supplementary material for: Predictive Value of the PaO2/FIO2 Ratio for Mortality in Patients with Acute Respiratory Distress Syndrome: A Systematic Review and Meta-Analysis
Source: Research Square preprint supplement (doi:10.21203/rs.3.rs-1042756/v1), 2021-11-15
Supplement: Supplementary file 1 [file 7db8c54523005f0f6603c59e.xlsx]

## Sheet: Sheet2
Table1. Characteristics of included studies
Year of publication	Author	PMID	Study design	Diagnostic or Prognostic Test Accuracy Study for PaO2/FIO2 ratio †	Country	Number of Patients	Ages(years±SD or mean (IQR))	Most frequent etiology or underlying disease of ARDS (%)	Berlin Definition	Timing of asssement PaO2/FIO2	Reference and outcomes	Index test	Cut off values of the index test	Comment
1994	Knaus	8049808	cohort study	NO	USA	17440	58±19	Infection/sepsis (38), abdomen surgery (12), trauma (9), aortic aneurysm (8), thoracic surgery (6), neurolgical disease (5), post-cardiac arrest (4), respiratory arrest (3), renal surgery (2), pancreatitis (1), pulmonary embolism (1), drug overdose (1) and others (9)	NO	Day of the diagnosis of ARDS	hospital mortality	PaO2/FIO2	≦ 150
2003	Suchyta	14605062	cohort study	NO	USA	548	54±10 for PaO2/FIO2 ≦105 in 1987-1990, 50±11, 52±10, 51±10, for ≦105, 106-174 and 173≦ respectively.	pneumonia(N/A), sepsis(N/A), trauma(N/A), others(N/A)	NO	Day of the diagnosis of ARDS	hospital mortality	PaO2/FIO2	≦105, 106-174, 173≦
2007	Villar	17585106	cohort study	NO	Spain	170	54 (35-66)	Pulmonary (54.7), nonpulmonary (45.3), pnuemoniae (27), aspiration (16.5), chest trauma (11.8), inhalation (0), sepsis (28.8), multiple trauma (17.6), pancreatitis (6.5) and overdose/poisoning (0.6)	NO	Day of the diagnosis of ARDS	ICU mortality	PaO2/FIO2	< 200 , 201-300 , 300<
2008	Meade	18270352	a randomized controlled trial	NO	Canada, Australia, Saudi Arabia.	983	54.5±16.5 and 56.9±16.5	sepsis (47.0), pneumoniae (44.7), gastric aspiration (19.4), multiple ransfusion (8.6), prolonged shock (6.0), pulmonary contusion (4.9), multiple major fractures (4.9), acute pancreatitis (4.8), drug overdose (4.0), p jiroveci (2.7), burn injury (2.1) and inhalation injury (1.0)	NO	Day of the diagnosis of ARDS	hospital mortality	PaO2/FIO2	1-106, 106-142, 142-180, 180-250
2008	Cooke	18434894	cohort study	NO	USA	1113	58±19	severe sepsis (79), trauma (3.5) and other (17) for dead and severe sepsis (68), trauma (7.3) and other (25) for alive	NO	Day of the diagnosis of ARDS	hospital mortality	PaO2/FIO2	≦100, 100<
2011	Britos	21532473	cohort study	NO	USA	2312	N/A	pneumonia (41), sepsis (24), aspiration (15), trauma (9), and other causes (11)	NO	Day of the diagnosis of ARDS	60-day mortality	PaO2/FIO2	< 200 , 201-300 , 300<
2012	Ranieri	22797452	cohort study	NO	Europe, North America, Australia, Tasmania etc	3670	N/A	N/A	NO	Day of the diagnosis of ARDS	Mortality	PaO2/FIO2	PaO2/FIO2≦100, 100<PaO2/FIO2≦200, 200<PaO2/FIO2≦300
2013	Hernu	24114319	cohort study	NO	France	278	60 (48–72) , 64 (54–74), 59 (46–70) for mild, moderate and severe group, respectively	N/A	YES	Day of the diagnosis of ARDS	28-day mortality	PaO2/FIO2	PaO2/FIO2≦100, 100<PaO2/FIO2≦200, 200<PaO2/FIO2≦300
2013	Villar	23370826	cohort study	NO	Spain	282	56 (40–73)	Pulmonary (50.7), nonpulmonary (49.3), sepsis (32.3), bacterial pnuemoniae (33.7), multiple trauma (11.7), aspiration (10.3), others (10)	NO	24h after the day of the diagnosis of ARDS	ICU mortality	PaO2/FIO2	PaO2/FIO2≦100, 100<PaO2/FIO2≦200, 200<PaO2/FIO2≦300
2013	Choi	24997724	cohort study	NO	South Korea	163	69±18	Aspiration (13.3), sepsis (44.9), pnuemonia (24.1), acute abdomen (1.9), chemotherapy (13.3), immunosuppressive condition (5.1), prior steroid therapy (3.2)	YES	Day of the diagnosis of ARDS	60-day mortality	PaO2/FIO2	PaO2/FIO2≦100, 100<PaO2/FIO2≦200, 200<PaO2/FIO2≦300
2015	Bhadade	29897698	cohort study	NO	India	116	51±17	Malaria (26.72), pneumonia (19.82), sepsis (17.2), dengue (12.96), undiagnosed fever (11.1), leptospirosis (6.03), pancreatitis (2.58), H1N1 infection (1.72), urinary tract infection (UTI) (0.86%) and UTI with pyelonephritis and dengue (0.86 )	YES	Day of the diagnosis of ARDS	ICU mortality	PaO2/FIO2	PaO2/FIO2≦100, 100<PaO2/FIO2≦200, 200<PaO2/FIO2≦300
2016	Chen	26271028	cohort study	NO	USA	362	51±18	Sepsis (82), Pneumonia (87), Aspration (55), Other (10)	YES	Day of the diagnosis of ARDS	hospital mortality	PaO2/FIO2	PaO2/FIO2≦100, 100<PaO2/FIO2≦200, 200<PaO2/FIO2≦300
2016	Laffey	27757516	cohort study	NO	Multi-national	2377	N/A	Pnuemonia (57.9), extrapulmonary sepsis (17.3), aspiration (15.6), trauma (4.5), inhalation (2.86), pancreatitis (2.06), pulmonary contusion (3.37), burn (0.34), pulmonary vasculitis (1.35), non-cardiogenic shock (8.37), drowning (0.08), drug overdose (2.06), blood transfusion (4.33), others (2.90)	YES	Day of the diagnosis of ARDS	ICU or hospital discharge, or at day 90, whichever occurred.	PaO2/FIO2	PaO2/FIO2≦100, 100<PaO2/FIO2≦200, 200<PaO2/FIO2≦300	LUNG SAFE STUDY
2016	Bos	27638132	cohort study	NO	USA	439	58.5±15.4 and 63.1±12.7 for survivers and non-survivers, respectively	Pnuemonia (61.3), aspiration (9.3), other pumonary (0.7), sepsis (62.9), trauma (12.1), pancreatitis (1.8) and other non pulmonary (10.5)	YES	24 hours after day of the diagnosis of ARDS	hospital mortality	PaO2/FIO2	PaO2/FIO2 <105, 105-158, 158<
2016	Villar	27035239	cohort study	NO	Spain	600	56±17 and 57±16 for derivation cohort and validation cohort, respectively	Pneumonia (43.0), sepsis (30.7), aspiration (9.7) and trauma (10.0) for deriblation cochort, pneumonia (45.3), sepsis (32.3), aspiration (9.3) and trauma (5.7) for validation cohort	YES	Day of the diagnosis of ARDS	hospital mortality	PaO2/FIO2	PaO2/FIO2 <105, 105-158, 158<
2016	Chawla	26643859	cohort study	NO	India	170	47.5±16.6	Pulmonary (58.8), extrapulmonary (32.9), both (8.2)	YES	Day of the diagnosis of ARDS	ICU mortality	PaO2/FIO2	PaO2/FIO2≦100, 100<PaO2/FIO2≦200, 200<PaO2/FIO2≦300
2016	Balzer	27821065	cohort study	NO	Germany	442	50 (37-61)	Pnuemonia (54.7), immuninsufficiency (15.1), acute on chronic (12.4), trauma (6.6), sepsis of extrapumonary origin (6.1) and other (5.0)	YES	3 days after the diagnosis of ARDS	hospital mortality	PaO2/FIO2 and oxygenation index (OI)	PaO2/FIO2≦100, 100<PaO2/FIO2≦200, 200<PaO2/FIO2≦300	2 by 2 table is not avairable for PaO2/FIO2
2016	Lai	27057912	cohort study	NO	Taiwan	238	62.7±16.5	Pnuemonia (70.6), sepsis other than lung infection (20.2), trandfusion-ralated acute lung injury (4.2), lung contusion (2.5), pancreatitis (1.3), nuerogenic pulmonary edema (0.8) and aspuration pnuemonitis (0.4)	YES	one day after the day of the diagnosis of ARDS	28-day mortality	PaO2/FIO2	PaO2/FIO2≦100, 100<PaO2/FIO2≦200, 200<PaO2/FIO2≦300
2017	Neuschwander	28038339	cohort study	NO	France	1004	57	cancer patients	YES	Day of the diagnosis of ARDS	hospital mortality	PaO2/FIO2	PaO2/FIO2≦100, 100<PaO2/FIO2≦200, 200<PaO2/FIO2≦300
2017	Kallet	28611227	cohort study	NO	USA	685	48±16 and 56±17 for survivers and non-survivers, respectively	pneumonia, sepsis, aspiration, trauma, others	YES	Day of the diagnosis of ARDS	hospital mortality	PaO2/FIO2	PaO2/FIO2≦100, 100<PaO2/FIO2≦200, 200<PaO2/FIO2≦300
2017	DesPrez	28823812	cohort study	NO	USA	329	51±18	Nonpulmonary sepsis (20), Pneumonia (14), Severe traumatic injuries (49), Aspiration (11), Multiple transfusions (2), Other (4)	YES	Day of the diagnosis of ARDS	hospital mortality	PaO2/FIO2 and OI	PaO2/FIO2≦100, 100<PaO2/FIO2≦200, 200<PaO2/FIO2≦300
2016	Bellani	27753501	cohort study	NO	Multi-national	2813	Age NIV 68 (54 to 78), Invasive-MV 63 (50 to 73), MalewithNIV 257(58.9%), Invasive MV 2377(84.5%)	N/A	YES	Day of the diagnosis of ARDS	All-cause, ICU, hospital mortality	PaO2/FIO2	PaO2/FIO2≦100, 100<PaO2/FIO2≦200, 200<PaO2/FIO2≦300	LUNG SAFE study
2019	Shen	31300012	cohort study	NO	USA	836	N/A for all patients	N/A	YES	Day of the diagnosis of ARDS	hospital mortality	PaO2/FIO2	PaO2/FIO2≦150, 150<PaO2/FIO2
2019	Kamo	30744598	cohort study	NO	Japan	153	61.7±15.1and 68.9±16.6 for survivers and non-survivers, respectively	pneumonia (37), aspiration (28), sepsis (6)	YES	Day of the diagnosis of ARDS	30-day mortality	PaO2/FIO2	PaO2/FIO2≦100, 100<PaO2/FIO2≦200, 200<PaO2/FIO2≦300
2019	Chan	30041997	cohort study	NO	Taiwan	263	59.8±14.6	complicated influenza infection (100)	YES	Day of the diagnosis of ARDS	30-day mortality	PaO2/FIO2	PaO2/FIO2≦100, 100<PaO2/FIO2≦200, 200<PaO2/FIO2≦300
2019	Chinh	31415662	cohort study	NO	Vietonam	126	47(32-60), 56(42-67) for survivers and non-survivers, respectively	Pneumonia (68), non-pulmonary sepsis (2), aspiration (3), major trauma (0), pulmonary contusion (3) inhalation injury (14), severe burns (1), non-cardiogenic shock (14), drug overdose or addiction (11)	YES	Day of the diagnosis of ARDS	hospital mortality, 30-day mortality	PaO2/FIO2	PaO2/FIO2≦100, 100<PaO2/FIO2≦200, 200<PaO2/FIO2≦300
2020	Fujishima	31348148	cohort study	NO	Japan	157	73.0 (60.0 – 78.0)	sepsis (N/A), trauma (N/A)	YES	Day of the diagnosis of ARDS	hospital mortality	PaO2/FIO2	PaO2/FIO2≦100, 100<PaO2/FIO2≦200, 200<PaO2/FIO2≦300
2020	Song	32326923	cohort study	NO	China	201	54.24 ± 16.35	Pneumonia (62), non-pulmonary sepsis (18), pancreatitis (7), trauma (3), aspiration (1), others (6)	YES	Day of the diagnosis of ARDS	30-day mortality, 100day mortality	PaO2/FIO2	PaO2/FIO2≦100, 100<PaO2/FIO2≦200, 200<PaO2/FIO2≦300
† Defined as the studies adhered to Standards for Reporting of Diagnostic accuracy (STARD) statement or Transparent reporting of a multivariable prediction model for individual prognosis or diagnosis（TRIPOD) statement. PMID, ; SD ,; IQR, ; ARDS, ; N/A, ICU, ; NIV, .
										inhospital	13	16
										ICU	4	6
										28	2	2
										30	2	4
										60	2	2
										mortality	1	2
										other	4	4
											28
										90		1
										100		1

## Sheet: Sheet1
Author	PMID	Berlin Definition
Bhadade	29897698	YES
Bos	27638132	YES
Laffey	27757516	YES
Lai	27057912	YES
Ranieri	22797452	NO
Balzer	27821065	YES
Bellani	27753501	YES
Britos	21532473	NO
Chan	30041997	YES
Chawla	26643859	YES
Chen	26271028	YES
Chinh	31415662	YES
Choi	24997724	YES
Cooke	18434894	NO
Des Prez	28611227	YES
Fujishima	31348148	YES
Hernu	24114319	YES
Kallet	28611227	YES
Kamo	30744598	YES
Knaus	8049808	NO
Meade	18270352	NO
Neuschwander	28038339	YES
Shen	31300012	YES
Song	32326923	YES
Suchyta	14605062	NO
Villar	17585106	NO
Villar	23370826	NO
Villar	27035239	YES
